# Supplementary material for: Classification for Avian Malaria Parasite Plasmodium Gallinaceum Blood Stages by Using Deep Convolutional Neural Networks
Source: Research Square preprint supplement (doi:10.21203/rs.3.rs-282527/v2), 2021-05-10
Supplement: Supplementary file 1 [file 059979d6b9cdaa455e6631ee.docx]

**Supplementary**

**Video 1:** Classification for avian malaria parasite Plasmodium gallinaceum blood stages by using deep convolutional neural networks in CiRA COREplatform.
